**Figure S1.** A dendrogram produced by hierarchical cluster analysis and an independently created heat map of signals cytokine and cytokine receptor transcripts compares the expression profiles of subjects within each disease group in array dataset 1. The end branch labels are N – NSOI, S – sarcoidosis, G – GPA, T – TED, C – control.

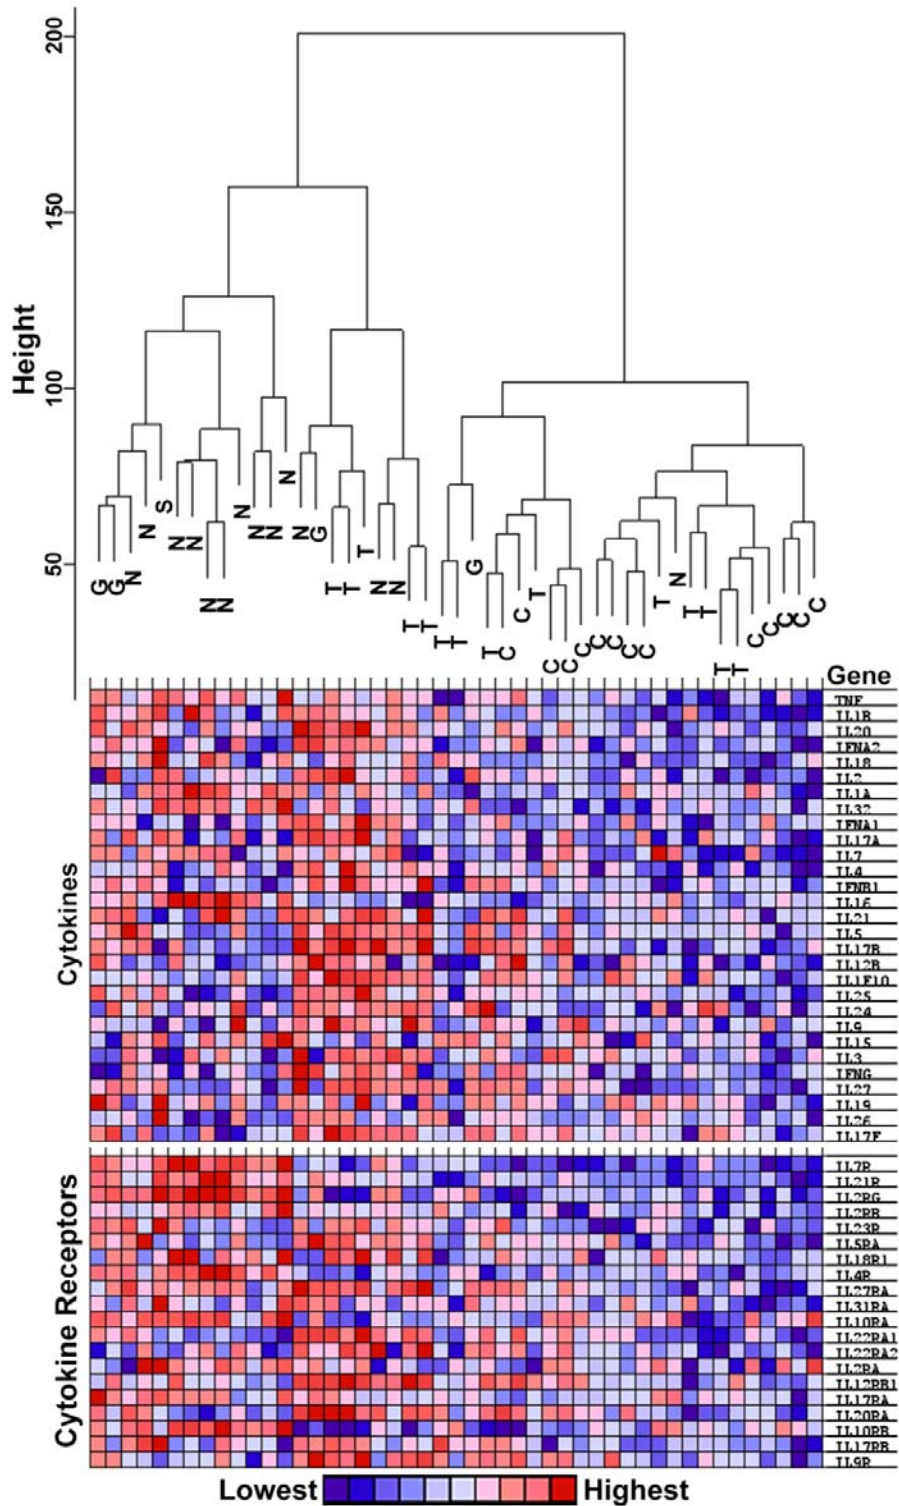

Source: https://storage.googleapis.com/plos-corpus-prod/10.1371/journal.pone.0137654/1/pone.0137654.s001.pdf
